# Supplementary material for: Gene Expression Profiles and microRNA Regulation Networks in Tiller Primordia, Stem Tips, and Young Spikes of Wheat Guomai 301
Source: MDPI journal article supplement (doi:10.3390/genes10090686), 2019-09-06
Supplement: s2 [file s2]

## Supplementary Figures

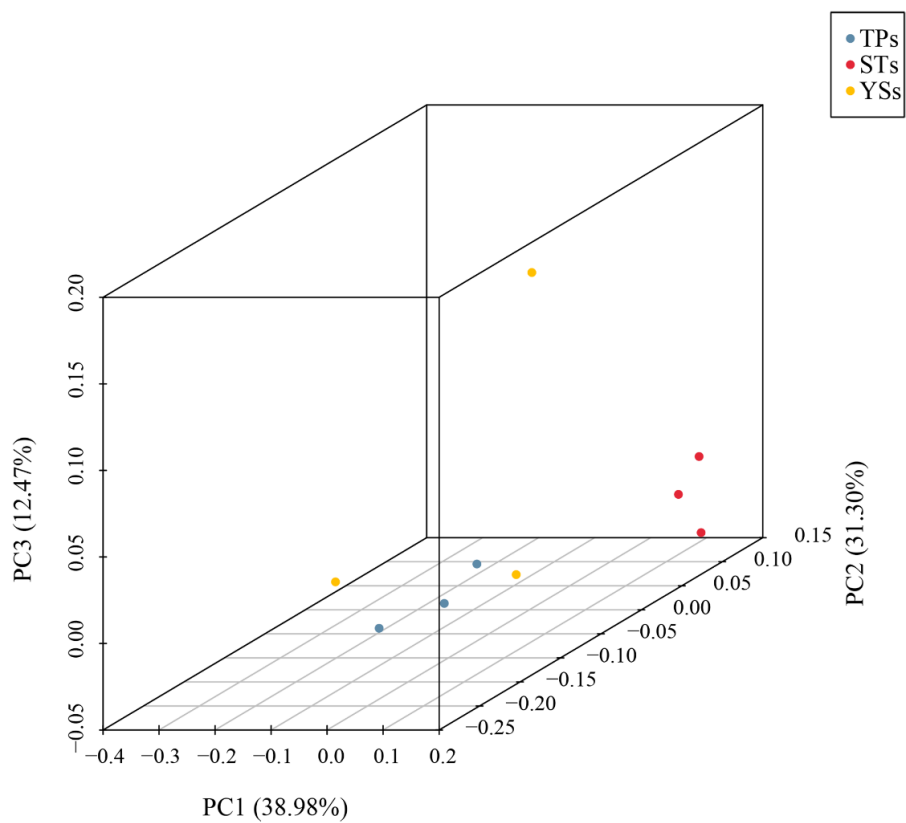

**Figure S1** The PCA map among the samples of transcriptome sequencing

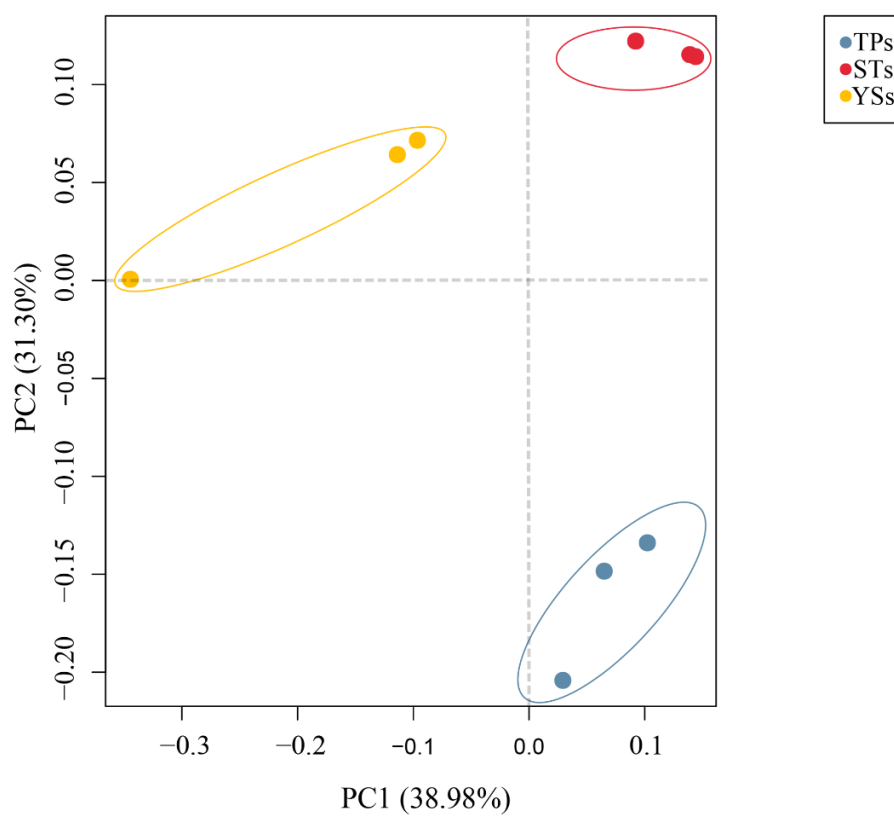

**Figure S2** The two-dimensional map of PCA among the transcriptome sequencing samples

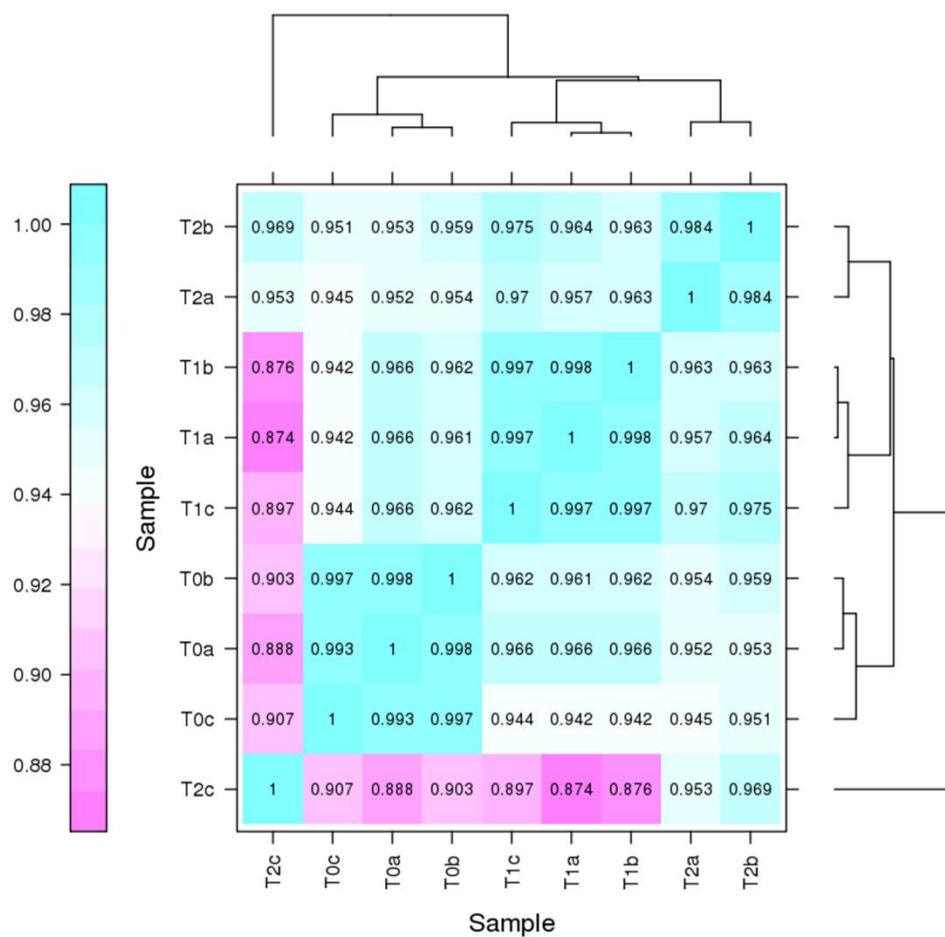

**Figure S3** PCC analysis of the transcriptome sequencing samples

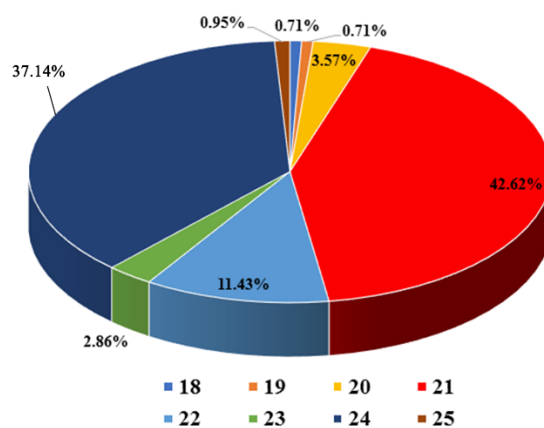

**Figure S4** Distribution map of the identified miRNAs with different lengths

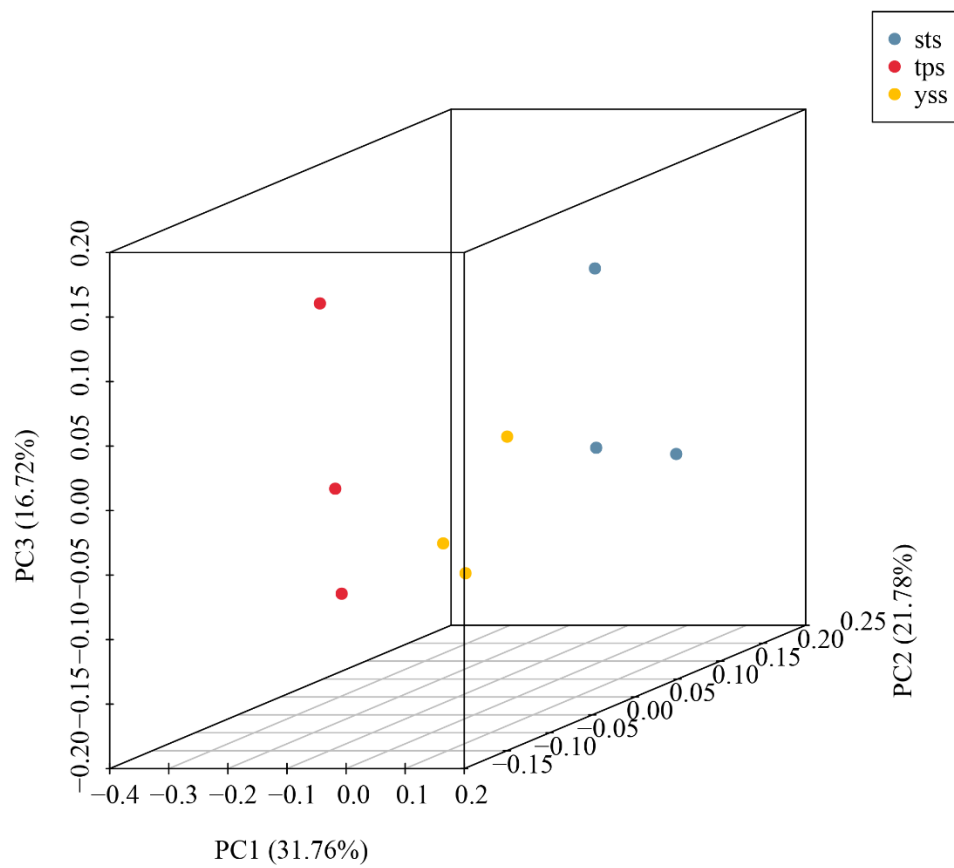

**Figure S5** The PCA map among the samples of miRNA sequencing

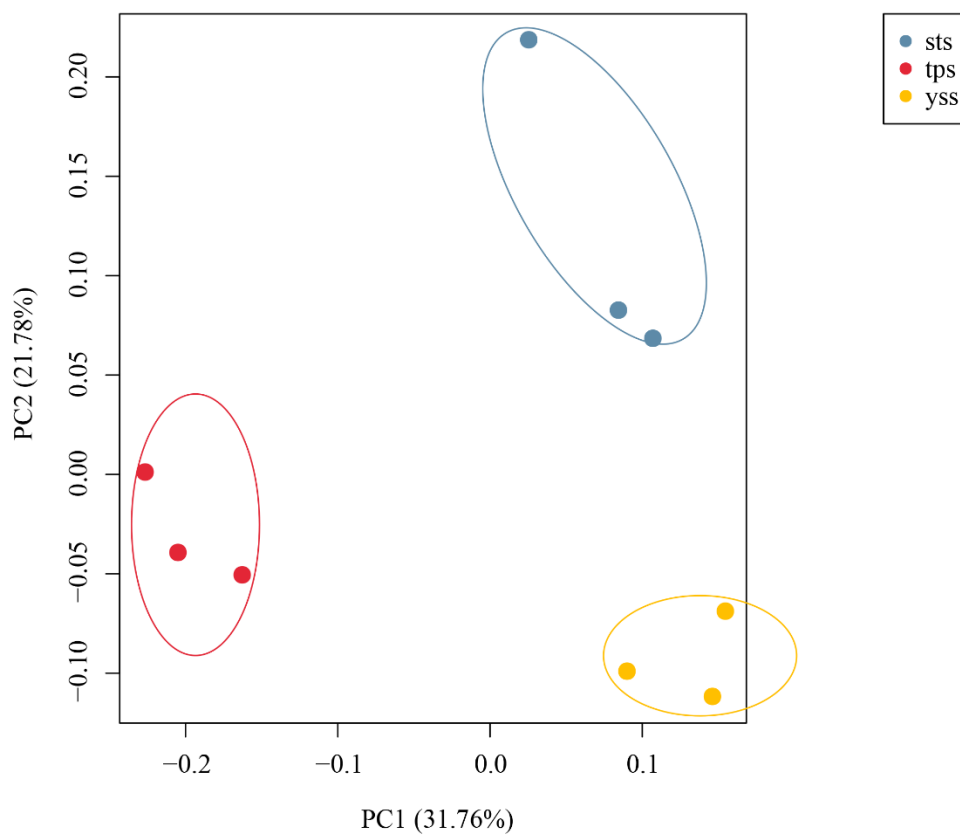

**Figure S6** The two-dimensional map of PCA among the miRNA sequencing samples

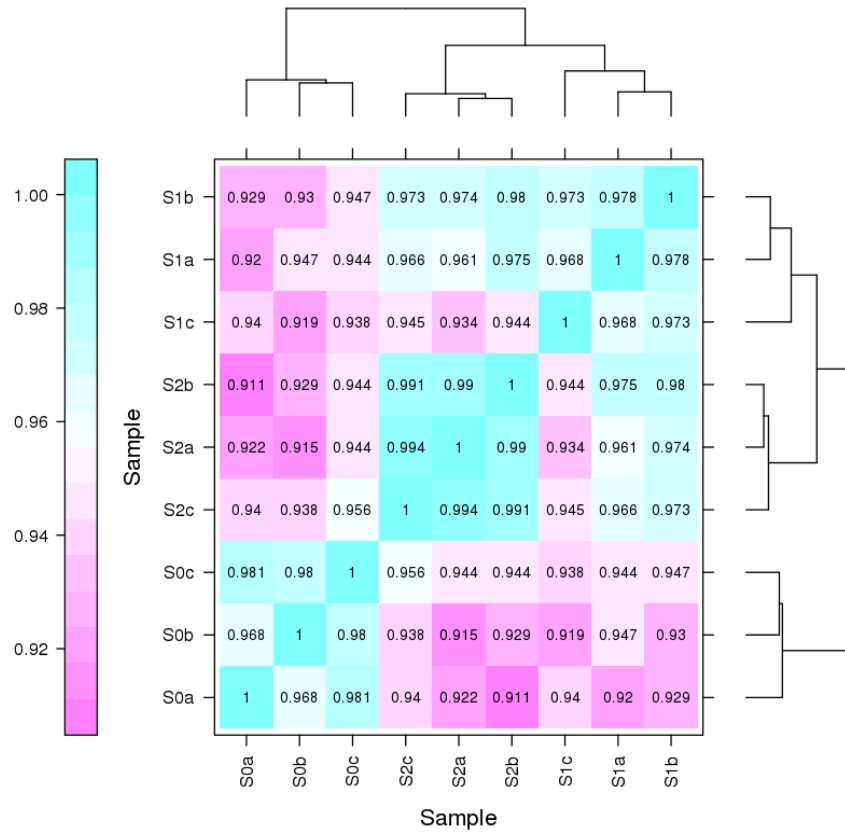

**Figure S7** PCC analysis of the small RNA sequencing samples

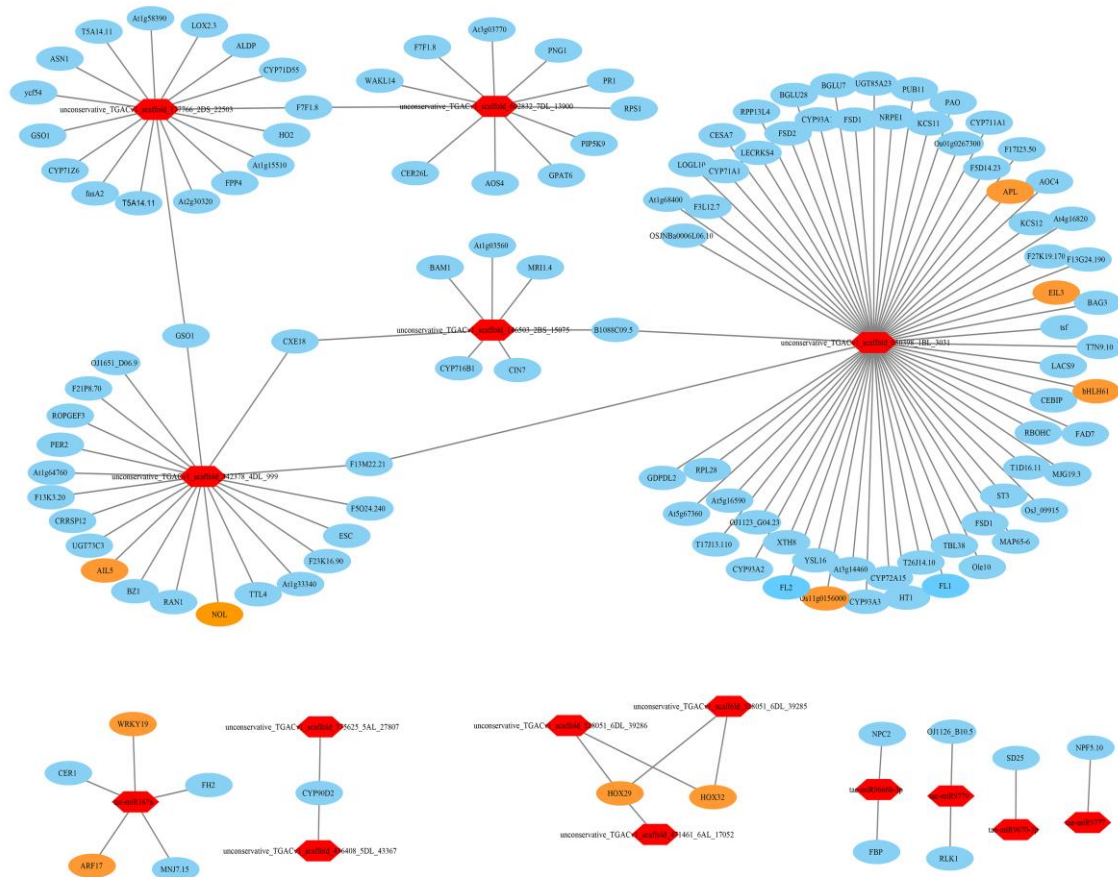

**Figure S8** A part of the 372 negative miRNA-mRNA interaction pairs (regulation network) in TPs. Red hexagons represented the highly expressed miRNAs in TPs. Ovals represented the target genes of miRNAs. Yellow ovals represented TFs.

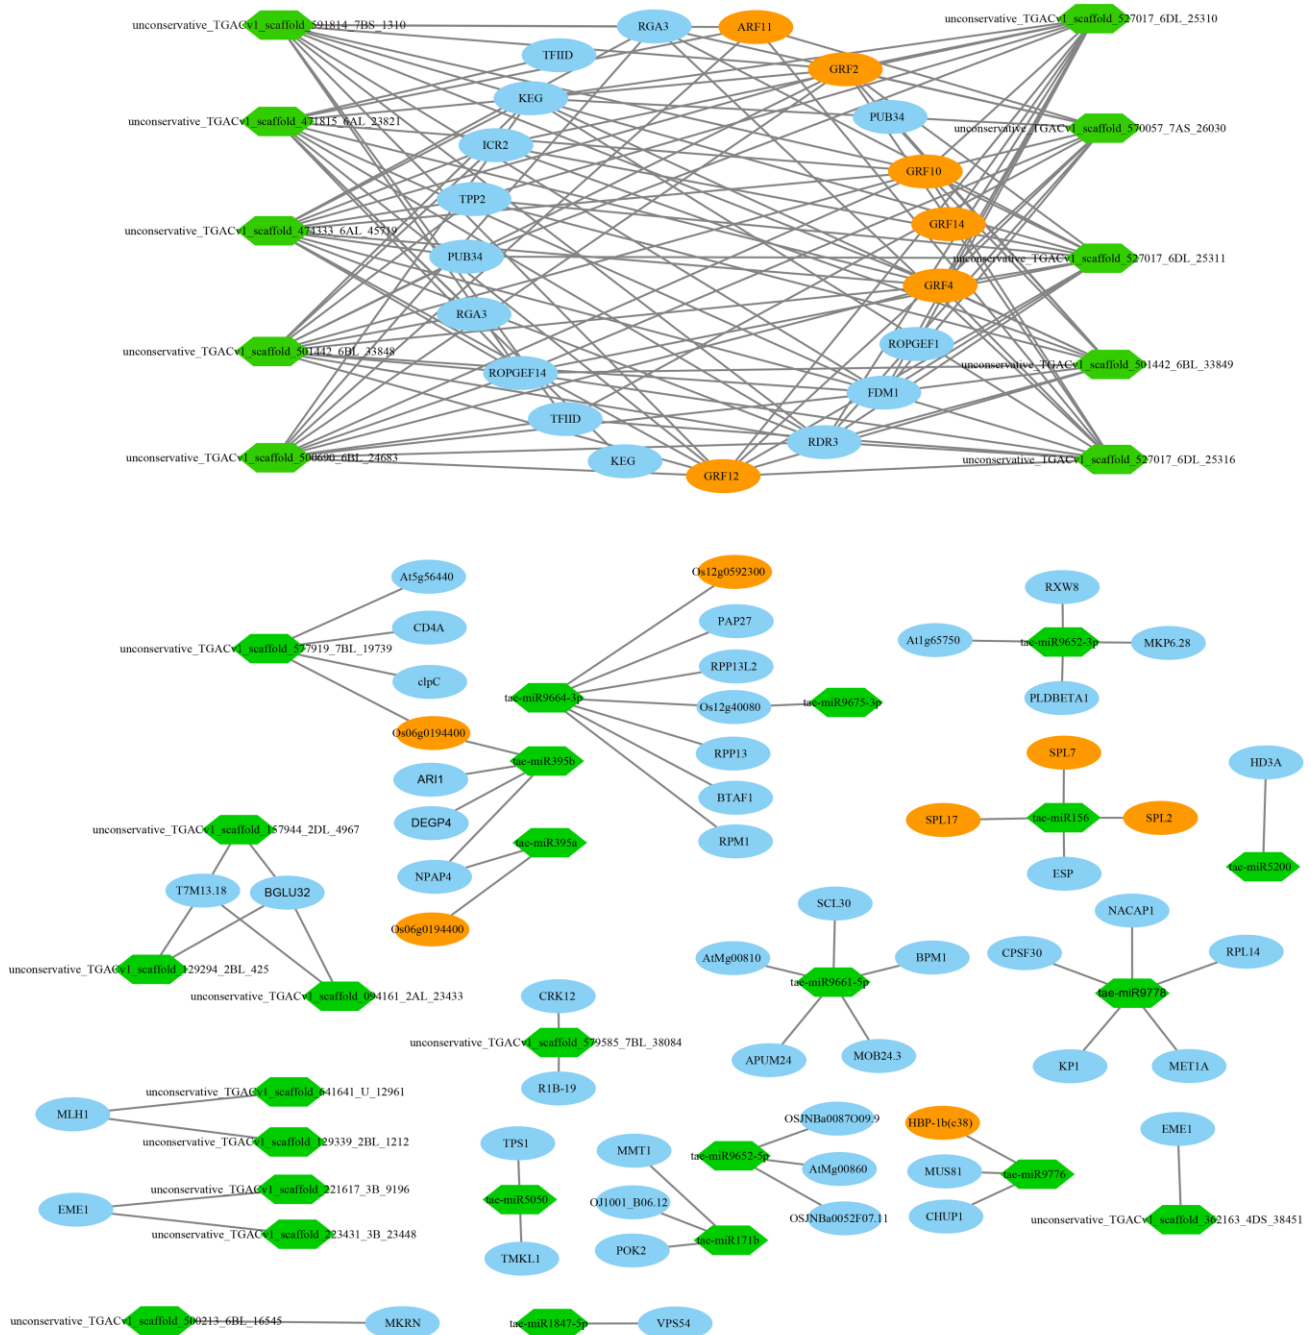

**Figure S9** A part of the 279 negative miRNA-mRNA interaction pairs (regulation network) in YSs. Green hexagons represented the highly expressed miRNAs in YSs. Ovals represented the target genes of miRNAs. Yellow ovals represented TFs.
